# Supplementary material for: Ribosome-Associated Mba1 Escorts Cox2 from Insertion Machinery to Maturing Assembly Intermediates
Source: PubMed Central journal article supplement (PMC5086520; doi:10.1128/mcb.00361-16), 2016-10-28
Supplement: MCB.00361-16_zmb999101339so1.pdf [file MCB.00361-16_zmb999101339so1.pdf]

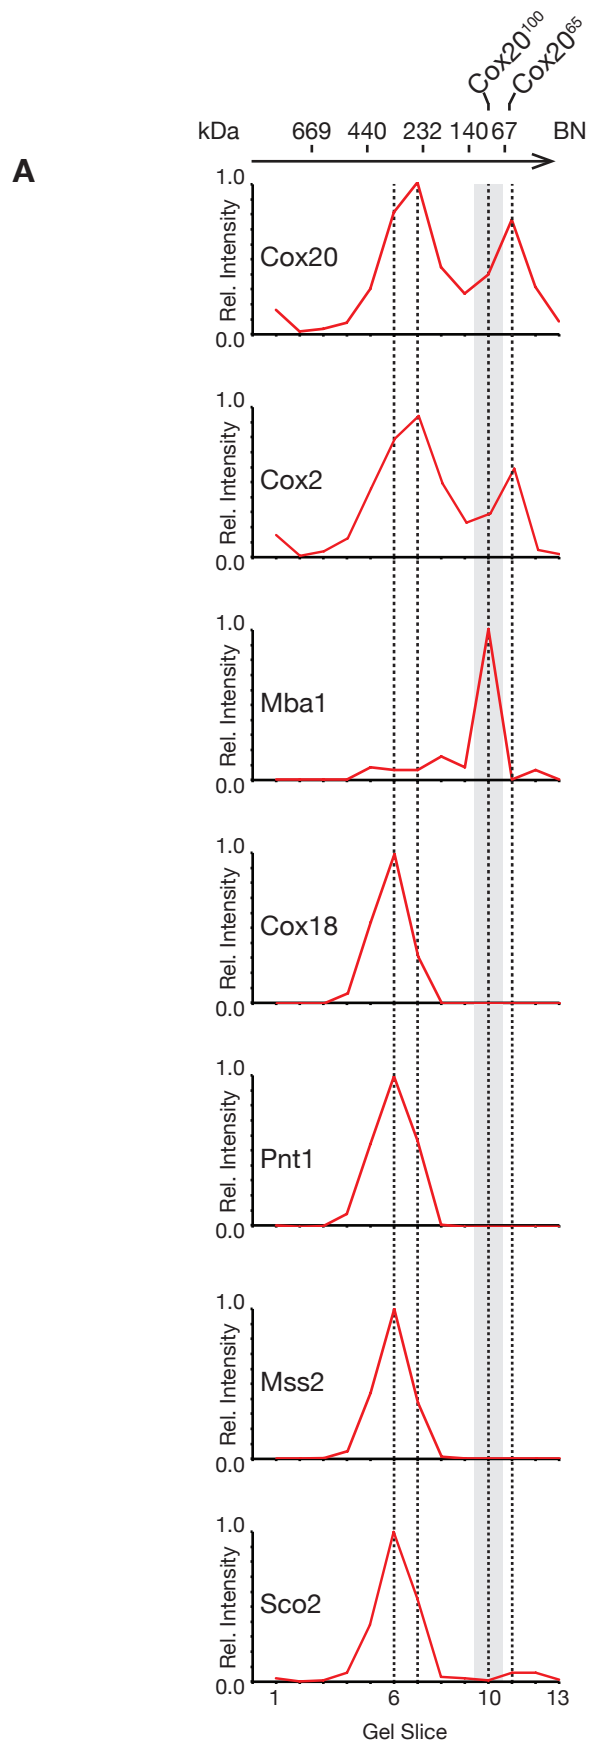

(A) Mass spectrometric analysis of Cox20<sup>ProtA</sup> isolated complexes after SILAC labeling. Equal amounts of Cox20<sup>ProtA</sup> light labeled mitochondria were mixed with the respective wild-type heavy labeled mitochondria, solubilized and subjected to IgG chromatography. Eluates were analyzed as described in Figure 3A. Dashed lines: gel fractions corresponding to the highest intensity Cox20 peaks. The Gray box indicates Cox20<sup>100</sup> complex.
